# Supplementary material for: The Dysfunctional Immune System in Common Variable Immunodeficiency Increases the Susceptibility to Gastric Cancer
Source: PubMed Central journal article supplement (PMC7349552; doi:10.3390/cells9061498), 2020-06-19
Supplement: cells-09-01498-s001.pdf [file cells-09-01498-s001.pdf]

## Appendix A

**Table A1.** Detailed IHC protocol for the antibodies used in this study.

| Antibody         | Clone     | Dilution | Antigen retrieval                    | Incubation time (min) | Incubation tempetaure | Source           |
|------------------|-----------|----------|--------------------------------------|-----------------------|-----------------------|------------------|
| CMV              | CCH2+DDG9 | 1:1000   | Protease3-8 min +<br>CC1-24 min-97°C | 40 min                | 37°C                  | DAKO             |
| CD4              | SP35      | RTU      | CC1-32 min-95°                       | 24 min                | 36°C                  | Ventana<br>Roche |
| CD8              | SP57      | RTU      | CC1-32 min-95°                       | 28 min                | 37°C                  | Ventana<br>Roche |
| CD8              | L26       | RTU      | CC1-24 min-95°                       | 24 min                | 37°C                  | Ventana<br>Roche |
| CD20             | B-A38     | RTU      | CC1-40 min-95°                       | 32 min                | 37°C                  | Cell Marque      |
| CD138/Syndecan-1 | AB54501   | 1:100    | CC1-40 min-95°                       | 36 min                | 37°C                  | Abcam            |
| Foxp3            | D13C9     | 1:200    | CC1-64 min-95°                       | 60 min                | 36°C                  | Cell signaling   |
| GATA3            | 22C3      | 1:80     | CC1-64 min-95°                       | 36 min                | 37°C                  | DAKO             |
| PD-L1            | CCH2+DDG9 | 1:1000   | Protease3-8 min +<br>CC1-24 min-97°C | 40 min                | 37°C                  | DAKO             |

RTU, Ready To Use.

**Table A2.** Detailed clinico-pathological characteristics of CVID patient cohort.

| Patient ID                                                     | 1                                                     | 2                                                                           | 3                                                                    | 4                                | 5                         | 6                                                                  | 7                         | 8                      | 9                                          |
|----------------------------------------------------------------|-------------------------------------------------------|-----------------------------------------------------------------------------|----------------------------------------------------------------------|----------------------------------|---------------------------|--------------------------------------------------------------------|---------------------------|------------------------|--------------------------------------------|
| <b>Gender</b>                                                  | Female                                                | Male                                                                        | Female                                                               | Female                           | Male                      | Male                                                               | Female                    | Female                 | Male                                       |
| <b>Age at first CVID symptoms</b>                              | 1                                                     | 17                                                                          | 13                                                                   | 16                               | 7                         | 2                                                                  | 16                        | NA                     | 15                                         |
| <b>Age at CVID diagnosis</b>                                   | 22                                                    | 19                                                                          | 21                                                                   | 18                               | 16                        | 22                                                                 | 30                        | 46                     | 15                                         |
| <b>Age at IgG replacement therapy</b>                          | 25                                                    | 25                                                                          | 28                                                                   | 34                               | 29                        | 39                                                                 | 30                        | 46                     | 15                                         |
| <b>Age at gastric cancer diagnosis</b>                         | 28                                                    | 43                                                                          | 40                                                                   | 27                               | 45                        | 60                                                                 | 38                        | 62                     | 47                                         |
| <b>Family history</b>                                          |                                                       |                                                                             |                                                                      |                                  |                           |                                                                    |                           |                        |                                            |
| Primary immunodeficiency                                       | No                                                    | No                                                                          | No                                                                   | No                               | IgA deficiency            | No                                                                 | No                        | No                     | No                                         |
| Autoimmune disorder                                            | Vitiligo                                              | No                                                                          | SS, ATD                                                              | Type 1 DM, ATD                   | No                        | No                                                                 | No                        | No                     | No                                         |
| Malignancy in relatives (years at diagnosis)                   | Breast (73)<br>Prostate (80)                          | Colon/rectum<br>(n=2; 80; 75)<br><b>Stomach</b><br>(n=2; 68; 68)            | Breast (51)<br>CNS (57)                                              | Colon/rectum (50)<br>Breast (36) | Breast (69)               | RCC (80)<br>Peritoneal carcinomatosis of unknown primary site (60) | Breast (57)               | No                     | <b>Stomach</b> (58)                        |
| <b>Autoimmune disorders</b>                                    | <b>Pernicious anaemia</b><br>AIP<br>RA-like symptoms  | <b>Pernicious anaemia</b><br>Psoriasis                                      | ITP<br>Vasculitis<br>RA-like symptoms                                | Alopecia<br>RA-like symptoms     | <b>Pernicious anaemia</b> | No                                                                 | <b>Pernicious anaemia</b> | No                     | No                                         |
| <b>Granulomatous disease</b>                                   | Lung/skin granulomas                                  | GLILD                                                                       | No                                                                   | GLILD                            | GLILD                     | No                                                                 | No                        | No                     | No                                         |
| <b>Gastrointestinal infection (excluding <i>H. pylori</i>)</b> | <i>C. jejuni</i><br><i>Salmonella spp.</i><br><br>CMV | <i>C. jejuni</i><br><i>Salmonella spp.</i><br><i>Giardia lamblia</i><br>CMV | <i>C. jejuni</i><br><i>Salmonella spp.</i><br><i>Giardia lamblia</i> | EBV<br>Norovirus<br>CMV          | <i>Giardia lamblia</i>    | <i>C. jejuni</i><br><i>Giardia lamblia</i>                         | <i>Giardia lamblia</i>    | <i>Giardia lamblia</i> | <i>C. jejuni</i><br><i>Giardia lamblia</i> |

|                                                                    |                                  |                                         |                                         |                   |                               |                              |                         |                         |                         |              |
|--------------------------------------------------------------------|----------------------------------|-----------------------------------------|-----------------------------------------|-------------------|-------------------------------|------------------------------|-------------------------|-------------------------|-------------------------|--------------|
| <b><i>H. pylori</i> infection</b>                                  | Positive                         | Positive                                | Positive                                | Positive          | Positive                      | Positive                     | Positive                | Positive                | Positive                | Negative     |
| <b>Prolonged use of PPI</b>                                        | Yes                              | Yes                                     | Yes                                     | NA                | Yes                           | No                           | Yes                     | Yes                     | Yes                     | NA           |
| <b>Histopathological features before GC diagnosis</b>              | Chronic gastritis<br>LGD and HGD | Chronic gastritis<br>IM<br>LGD adenomas | Chronic gastritis<br>Hyperplastic polyp | Chronic gastritis | Chronic gastritis<br>IM       | NA                           | Chronic gastritis<br>IM | Chronic gastritis<br>IM | Chronic gastritis<br>IM | NA           |
| <b>Surgery</b>                                                     | Total gastr.                     | Total gastr.                            | Total gastr.                            | Total gastr.      | No<br>(unresectable disease)  | No<br>(unresectable disease) | Total gastr.            | Distal gastr.           | Total gastr.            | Total gastr. |
| <b>Chemotherapy</b>                                                | No                               | No                                      | No                                      | No                | No                            | Palliative                   | No                      | No                      | No                      | No           |
| <b>Other malignancy (years at diagnosis)</b>                       | No                               | Rectal adenocarcinoma (49)              | No                                      | No                | HCC (45)                      | No                           | No                      | No                      | No                      | No           |
| <b>Histopathological findings in non-neoplastic mucosa (n=7/9)</b> |                                  |                                         |                                         |                   |                               |                              |                         |                         |                         |              |
| <b>Atrophic chronic gastritis</b>                                  | Present                          | Present                                 | Present                                 | Present           | Present                       | NA                           | NA                      | Present                 | Present                 | Present      |
| <b>Lymphocytic gastritis</b>                                       | Exuberant                        | Present                                 | Present                                 | Exuberant         | Present                       | NA                           | NA                      | Present                 | Present                 | Present      |
| <b>Lymphoid follicles</b>                                          | Absent                           | Absent                                  | Absent                                  | Present           | Present                       | NA                           | NA                      | Present                 | Present                 | Present      |
| <b>Neutrophilic activity</b>                                       | Absent                           | Absent                                  | Absent                                  | Present           | Absent                        | NA                           | NA                      | Absent                  | Present                 | Present      |
| <b>Intestinal metaplasia</b>                                       | Absent                           | Extensive                               | Extensive                               | Present           | Present                       | NA                           | NA                      | Present                 | Present                 | Extensive    |
| <b>EBV infection (EBER-ISH)</b>                                    | Absent                           | Absent                                  | Absent                                  | Absent            | Rare lymphocytes <sup>+</sup> | NA                           | NA                      | Absent                  | Absent                  | Absent       |
| <b>CMV infection (IHC)</b>                                         | Absent                           | Absent                                  | Absent                                  | Absent            | Absent                        | NA                           | NA                      | Absent                  | Absent                  | Absent       |

| Histopathological features of gastric cancer |                           |                 |            |               |            |            |            |                           |            |
|----------------------------------------------|---------------------------|-----------------|------------|---------------|------------|------------|------------|---------------------------|------------|
| <b>Location</b>                              | Antrum                    | Antrum          | Corpus     | Antrum        | Antrum     | Corpus     | Corpus     | Antrum                    | Corpus     |
| <b>pT stage</b>                              | pT1a                      | pT1a            | pT2        | pT1a          | NA         | NA         | pT1a       | pT1b                      | pT1b       |
| <b>Greatest dimension</b>                    | 4.5 cm                    | 0.5 cm          | 1.5 cm     | 1.8 cm        | NA         | NA         | 1.0 cm     | 2.5 cm                    | 0.6 cm     |
| <b>pN stage</b>                              | pN0                       | pN0             | pN0        | pN0           | NA         | NA         | pN0        | pN0                       | pN0        |
| <b>Laurén classification</b>                 | Intestinal                | Diffuse         | Intestinal | Indeterminate | Intestinal | Intestinal | Intestinal | Indeterminate             | Intestinal |
| <b>WHO classification</b>                    | Tub/Pap                   | Poorly cohesive | Tub/Pap    | Mucinous      | Tub/Pap    | Tub/Pap    | Tub/Pap    | Mucinous                  | Tub/Pap    |
| <b>Grading</b>                               | Low grade                 | NA              | High grade | NA            | High grade | High grade | Low grade  | NA                        | Low grade  |
| <b>Precursor lesion</b>                      | Intestinal adenoma<br>LGD | Absent          | Absent     | Absent        | NA         | NA         | Absent     | Intestinal adenoma<br>LGD | Absent     |
| <b>EBV infection (EBER-ISH)</b>              | Absent                    | Absent          | Absent     | Absent        | Absent     | Absent     | Absent     | Absent                    | Absent     |
| <b>CMV infection (IHC)</b>                   | Absent                    | Absent          | Absent     | Absent        | Absent     | Absent     | Absent     | Absent                    | Absent     |

**AIP**, Autoimmune pancreatitis; **ATD**, Autoimmune Thyroid Disease; *C. jejuni*, *Campylobacter jejuni*; **CMV**, Cytomegalovirus; **CNS**, Central Nervous System; **DM**, Diabetes Mellitus; **EBER-ISH**, EBV Encoded RNA *In Situ* Hybridization; **EBV**, Epstein-Barr Virus; **Gastr**, Gastrectomy; **GC**, Gastric Cancer; **GLILD**, Granulomatous Lymphocytic Interstitial Lung Disease; *H. pilory*, *Helicobacter pylori*; **HCC**, Hepatocellular Carcinoma; **HGD**, High Grade Dysplasia; **IHC**, Immunohistochemistry; **IM**, Intestinal Metaplasia; **ITP**, Immune Thrombocytopenia; **LGD**, Low Grade Dysplasia; **NA**, Not Available; **PPI**, Proton-pump Inhibitor; **RA**, Rheumatoid Arthritis; **RCC**, Renal Cell Carcinoma; **RLH**, Reactive Lymphoid Hyperplasia; **SS**, Sjogren's syndrome; **Tub/pap**, Tubular/Papillary.

**Table A3.** Detailed results of the immune cell counting (Foxp3, GATA3, CD4, CD8, CD20) in non-neoplastic mucosa (distant from and adjacent to tumour) and adenocarcinomas of CVID patients in comparison with non-CVID patients infected by *Helicobacter pylori*.

| Immune cell biomarker                                                         | CVID patients                                                     | Non-CVID patients                                                 | <i>p</i> value |
|-------------------------------------------------------------------------------|-------------------------------------------------------------------|-------------------------------------------------------------------|----------------|
|                                                                               | <i>H. Pylori</i> positive<br>n=8                                  | <i>H. Pylori</i> positive<br>n=6                                  |                |
| <b>1. Non-neoplastic mucosa distant from gastric cancer (intraepithelial)</b> |                                                                   |                                                                   |                |
|                                                                               | n=6/8 (95% CI)<br>Median value<br>(No. positive cells per 20x PF) | n=6/6 (95% CI)<br>Median value<br>(No. positive cells per 20x PF) |                |
| Foxp3                                                                         | 3.0 (3.0-16.0)                                                    | 0.0 (0.0-1.0)                                                     | <b>0.015*</b>  |
| GATA3                                                                         | 32.0 (2.0-38.0)                                                   | 1.5 (0.0-5.0)                                                     | <b>0.015*</b>  |
| CD4                                                                           | 5.5 (2.0-9.0)                                                     | 11.0 (2.0-34.0)                                                   | 0.818          |
| CD8                                                                           | 77.0 (40.0-374.0)                                                 | 36.5 (11.0-52.0)                                                  | 0.132          |
| CD20                                                                          | 0.0 (0.0-0.0)                                                     | 6.0 (0.0-21.0)                                                    | <b>0.015*</b>  |
| <b>2. Non-neoplastic mucosa distant from gastric cancer (lamina propria)</b>  |                                                                   |                                                                   |                |
|                                                                               | n=6/8 (95% CI)<br>Median value<br>(No. positive cells per 20x PF) | n=6/6 (95% CI)<br>Median value<br>(No. positive cells per 20x PF) |                |
| Foxp3                                                                         | 68.05 (24.0-181.0)                                                | 7.0 (3.0-11.5)                                                    | <b>0.004*</b>  |
| GATA3                                                                         | 181.5 (18.4-570.0)                                                | 11.5 (3.0-25.0)                                                   | <b>0.004*</b>  |
| CD4                                                                           | 159.5 (116.0-509.0)                                               | 67.0 (2.2-101.0)                                                  | <b>0.004*</b>  |
| CD8                                                                           | 161.5 (84.0-186.0)                                                | 36.5 (24.0-43.0)                                                  | <b>0.002*</b>  |
| CD20                                                                          | 10.5 (7.5-89.0)                                                   | 23.0 (14.3-5.1)                                                   | 0.589          |
| CD138                                                                         | 2.0 (0.0-40.0)                                                    | 110.0 (61.0-141.0)                                                | <b>0.002*</b>  |
| <b>3. Non-neoplastic mucosa adjacent to gastric cancer (intraepithelial)</b>  |                                                                   |                                                                   |                |
|                                                                               | n=6/8 (95% CI)<br>Median value<br>(No. positive cells per 20x PF) | n=6/6 (95% CI)<br>Median value<br>(No. positive cells per 20x PF) |                |
| Foxp3                                                                         | 1.0 (0.0-1.0)                                                     | 0.0 (0.0-1.0)                                                     | 0.310          |

|                                                                             |                                 |                                 |               |
|-----------------------------------------------------------------------------|---------------------------------|---------------------------------|---------------|
| GATA3                                                                       | 8.0 (0.0-21.0)                  | 1.5 (0.0-7.0)                   | 0.180         |
| CD4                                                                         | 11.5 (3.5-37.0)                 | 8.0 (2.1-33.3)                  | 0.699         |
| CD8                                                                         | 32.0 (21.0-189.0)               | 13.5 (11.0-38.5)                | 0.310         |
| CD20                                                                        | 0.0 (0.0-0.0)                   | 4.5 (2.0-9.4)                   | <b>0.002*</b> |
| <b>4. Non-neoplastic mucosa adjacent to gastric cancer (lamina propria)</b> |                                 |                                 |               |
|                                                                             | n=6/8                           | n=6/6                           |               |
|                                                                             | Median value (95% CI)           | Median value (95% CI)           |               |
|                                                                             | (No. positive cells per 20x PF) | (No. positive cells per 20x PF) |               |
| Foxp3                                                                       | 48.0 (18.0-109.0)               | 5.5 (2.1-10.0)                  | <b>0.002*</b> |
| GATA3                                                                       | 36.0 (27.0-145.0)               | 12.0 (2.0-29.6)                 | <b>0.065</b>  |
| CD4                                                                         | 75.5 (60.0-409.0)               | 51.0 (3.0-97.1)                 | <b>0.004*</b> |
| CD8                                                                         | 132.05 (128.0-494.0)            | 21.5 (13.2-40.0)                | <b>0.002*</b> |
| CD20                                                                        | 3.0 (3.0-17.0)                  | 30.0 (8.3-37.8)                 | <b>0.026*</b> |
| CD138                                                                       | 0.0 (0.0-0.0)                   | 57.0 (31.8-130.3)               | <b>0.002*</b> |
| <b>5. Gastric cancer (intraepithelial and stromal compartments)</b>         |                                 |                                 |               |
|                                                                             | n=8/8                           | n=6/6                           |               |
|                                                                             | Median value (95% CI)           | Median value (95% CI)           |               |
|                                                                             | (No. positive cells per 20x PF) | (No. positive cells per 20x PF) |               |
| Foxp3                                                                       | 66.5 (54.0-75.0)                | 8.0 (6.0-16.0)                  | <b>0.001*</b> |
| GATA3                                                                       | 74.5 (53.0-65.0)                | 26.0 (3.0-28.0)                 | <b>0.008*</b> |
| CD4                                                                         | 291.5 (222.0-372.0)             | 41.5 (32.1-101.0)               | <b>0.003*</b> |
| CD8                                                                         | 115.0 (45.0-303.0)              | 34.5 (24.2-48.7)                | <b>0.005*</b> |
| CD20                                                                        | 8.5 (1.0-11.0)                  | 22.5 (15.1-51.2)                | <b>0.029</b>  |
| CD138                                                                       | 2.0 (2.0-26.0)                  | 16.5 (8.5-52.0)                 | <b>0.108</b>  |

Statistically significant results are highlighted by an asterisk (\*). Differences in comparison with the analyses performed in the totality of CVID and non-CVID patients (Table 2) are highlighted in red.

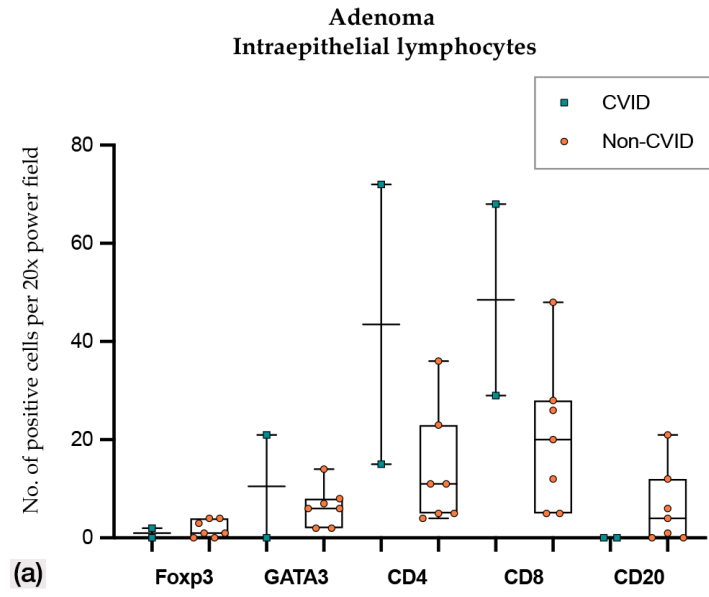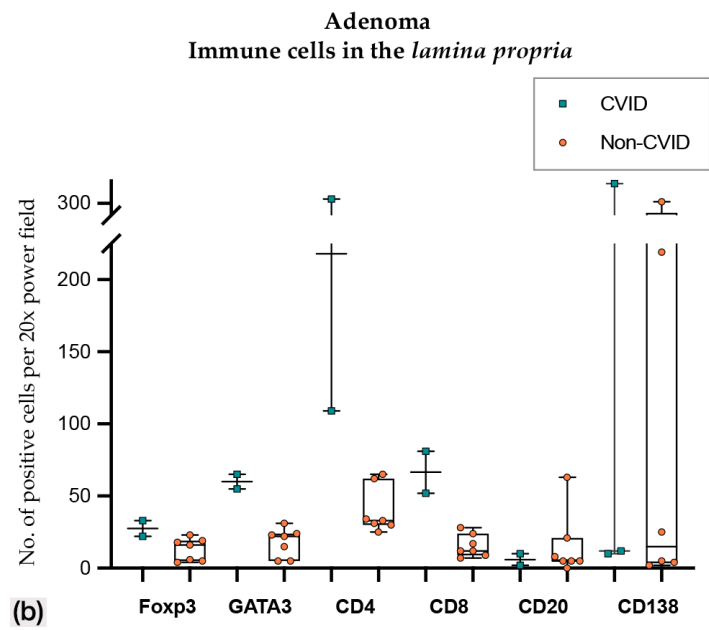

**Figure A1.** Immune cell counting in epithelial and lamina propria compartments in adenomatous lesions from CVID and non-CVID patients. No statistically significant differences were found when CVID and non-CVID patients were compared.
